# Supplementary material
Source: publisher figshare collection journal article supplement (https://gsajournals.figshare.com/ndownloader/files/14358341)
Supplement: Supplementary file 1 [file 14358341]

**File S2.** A README file associated with raw datafiles for Everman et al. 2019. See "EvermanData.tar.gz" file.

Directory = DSPR\_Data/

### **DSPR\_1.txt**

Tab-separated text file of raw DSPR starvation and desiccation resistance reported in hours for each fly per experimental vial. (Data are presented in Figure 1, Figure 3, Figure 6, Figure S2, Figure S5, Figure S7, Figure S11.)

Column headers:

Mapping.Panel = DSPR, Drosophila Synthetic Population Resource  
Trait = StarvationResistance or DesiccationResistance  
RIL.ID = Recombinant Inbred Line ID from the DSPR  
VialID = Unique number corresponding to each experimental vial  
Sex = (m) Male or (f) Female  
FlyID = Unique identifier for individual flies in each vial  
LifespanHrs = Lifespan in hours for each individual fly

### **DSPR\_2.txt**

Tab-separated text file of raw founder starvation resistance reported in hours for each fly per experimental vial. (Data are presented in Figure 1.)

Column headers:

Trait = StarvationResistance  
DSPR.founder = DSPR founder line ID  
Sex = (m) Male or (f) Female  
RepVial = Vial replicate number  
FlyID = Unique identifier for individual flies in each vial  
LifespanHrs = Lifespan in hours for each individual fly

### **DSPR\_3.txt**

Tab-separated text file of raw female DSPR triglyceride levels reported per plate well. (Data are presented in Figure 5, Figure 6, Figure S3.)

Column headers:

Mapping.Panel = DSPR, Drosophila Synthetic Population Resource  
Trait = TriglycerideLevel  
RIL.ID = Recombinant Inbred Line ID from the DSPR  
NumericPlateID = Unique number corresponding to each plate  
WellID = ID corresponding to each well of the plate  
SampleID = Unique identifier for samples  
TrueSerumTriglyConc = Triglyceride level per sample based on five females per sample

#### **DSPR\_4.txt**

Tab-separated text file of raw DSPR starvation resistance reported in hours using *Drosophila* Activity Monitors (DAM). (Data are presented in Figure S7.)

Column headers:

Mapping.Panel = DSPR, *Drosophila* Synthetic Population Resource  
Trait = StarvationResistance  
RIL.ID = Recombinant Inbred Line ID from the DSPR  
StarvationClass = Categorical variable (HighStarvClass or LowStarvClass)  
based on data from DSPR\_1.txt  
Sex = (M) Male or (F) Female  
MonitorID = Unique identifier for DAM  
MonitorTubeID = Unique identifier for each tube in each DAM  
LifespanHrs = Lifespan in hours for each fly

#### **DSPR\_5.txt**

Tab-separated text file of DSPR activity reported under non-stressful conditions using *Drosophila* Activity Monitors (DAM). (Data are presented in Figure 4.)

Column headers:

Mapping.Panel = DSPR, *Drosophila* Synthetic Population Resource  
RIL.ID = Recombinant Inbred Line ID from the DSPR  
Trait = Activity  
Sex = (m) Male or (f) Female  
StarvationClass = Categorical variable (HighStarvClass or LowStarvClass)  
based on data from DSPR\_1.txt  
N = Number of flies tested  
ActLight.Mean = Mean activity levels under light conditions  
ActLight.SD = Standard deviation for activity levels under light conditions  
ActDark.Mean = Mean activity levels under dark conditions  
ActDark.SD = Standard deviation for activity levels under dark conditions

#### **DSPR\_6.txt**

Tab-separated text file of DSPR activity reported under starvation conditions using *Drosophila* Activity Monitors (DAM). (Data are presented in Figure S13.)

Column headers:

Mapping.Panel = DSPR, *Drosophila* Synthetic Population Resource  
RIL.ID = Recombinant Inbred Line ID from the DSPR  
LightStatus = (L) light or (D) dark  
SamplingPeriod = Day of experiment  
FemaleMeanActivity = Mean activity of females  
MaleMeanActivity = Mean activity of males

### **DSPR\_7.txt**

Tab-separated text file of DSPR average starvation resistance reported in hours under different rearing density treatments. (Data are presented in Figure S1.)

Column headers:

Mapping.Panel = DSPR, Drosophila Synthetic Population Resource  
Trait = StarvationResistance  
RIL.ID = Recombinant Inbred Line ID from the DSPR  
Treatment = Density (60 eggs placed into rearing vials) or Population (females laid eggs for 1-2 days with visual assessment of density)  
TotalAdults = Total number of flies that emerged from each vial  
VialID = Unique identifier for each experimental vial  
N = Number of flies per experimental vial  
LifespanHrs = Average lifespan in hours for each experimental vial

### **DSPR\_8.txt**

Tab-separated text file of DSPR % survival on starvation media under different rearing density treatments. (Data are presented in Figure S1.)

Column headers:

Mapping.Panel = DSPR, Drosophila Synthetic Population Resource  
Trait = StarvationResistance  
RIL.ID = Recombinant Inbred Line ID from the DSPR  
Treatment = Density (60 eggs placed into rearing vials) or Population (females laid eggs for 1-2 days with visual assessment of density)  
TotalAdults = Total number of flies that emerged from each vial  
VialID = Unique identifier for each experimental vial  
ScreenpointHrs = Hour intervals at which flies in each vial were counted  
Survival% = Percent of flies in each vial that were alive at each screenpoint

### **DSPR\_9.txt**

Tab-separated text file of DSPR LOD score from QTL mapping analysis. (Data are presented in Figure S14 and Figure S15.)

Column headers:

DSPR.Panel = pA or pB mapping panel from the DSPR  
Trait = StarvationResistance or TriglycerideLevels  
sex = (m) Male or (f) Female  
chr = Chromosome (X, 2L, 2R, 3L, 3R)  
Ppos = Position on chromosome based on assembly 5.0  
Gpos = Genetic position  
LOD = LOD score from QTL mapping analysis

### **DSPR\_10.txt**

Tab-separated text file of observed and estimated starvation resistance in DSPR founders. (Data are presented in Figure 7.)

Column headers:

DSPR.founder = pA or pB mapping panel from the DSPR  
ObservedStarvationResistance = Mean observed starvation resistance of each founder line  
EstimatedStarvationResistance = Weighted estimated mean starvation resistance of each founder line determined from QTL analysis

### **DSPR\_11.txt**

Tab-separated text file of DSPR starvation resistance and triglyceride level after accounting for variation due to haplotype at overlapping peaks. (Data are presented in Figure S16.)

Column headers:

FounderHaplotype = Predicted haplotype at overlapping QTL

StarvationResistance = Mean starvation resistance

TriglycerideLevel = Mean triglyceride level

N\_Starv = Number of RILs with the corresponding predicted founder  
haplotype for Starvation QTL

N\_Tri = Number of RILs with the corresponding predicted founder  
haplotype for Triglyceride QTL

Directory = DGRP\_Data/

### **DGRP\_1.txt**

Tab-separated text file of raw DGRP starvation resistance reported in hours for each fly per experimental vial. Average response per sex and line was used in GWA. (Data are presented in Figure 2, Figure S4, Figure S5, Figure S8, Figure S12, used to generate Figure 17, Figure S18, Figure S19.)

Column headers:

Mapping.Panel = DGRP, Drosophila Genetic Reference Panel

Trait = StarvationResistance

RAL.ID = Line ID based on RAL identifier

Bloomington.ID = Bloomington stock ID

Sex = (M) Male or (F) Female

VialID = Unique identifier for each experimental vial

FlyID = Unique identifier for individual flies in each vial

LifespanHrs = Lifespan in hours for each individual fly

### **DGRP\_2.txt**

Tab-separated text file of DGRP average starvation resistance reported in hours in different environments and on different starvation media types. (Data are presented in Figure S9.)

Column headers:

Mapping.Panel = DGRP, Drosophila Genetic Reference Panel

Trait = StarvationResistance

RAL.ID = Line ID based on RAL identifier

Environment = Flies were maintained at 25°C with a 12:12hr L:D cycle  
(25°C\_12hr) or 23°C with constant light (23°C\_24hr)

Media = Preservatives or NoPreservatives in the starvation media

VialID = Unique identifier for each experimental vial

N = Number of flies per experimental vial

LifespanHrs = Average lifespan in hours for each experimental vial

### **DGRP\_3.txt**

Tab-separated text file of DGRP % survival in different environments and on different starvation media types. (Data are presented in Figure S9.)

Column headers:

Mapping.Panel = DGRP, Drosophila Genetic Reference Panel  
Trait = StarvationResistance  
RAL.ID = Line ID based on RAL identifier  
Media = Preservatives or NoPreservatives in the starvation media  
Environment = Flies were maintained at 25°C with a 12:12hr L:D cycle  
(25°C\_12hr) or 23°C with constant light (23°C\_24hr)  
VialID = Unique identifier for each experimental vial  
ScreenpointHrs = Hour intervals at which flies in each vial were counted  
Survival% = Percent of flies in each vial that were alive at each screenpoint

### **DGRP\_4.txt**

Tab-separated text file of DGRP starvation resistance for lines shared between this study, Mackay et al. 2012, and Everman and Morgan 2018. (Data are presented in Figure S8, Figure S10.)

Column headers:

RAL.ID = Line ID based on RAL identifier  
Sex = (M) Male or (F) Female  
LifespanHrs\_EvermanetAl.2019 = Mean starvation resistance reported in this study  
LifespanHrs\_MackayEtAl.2012 = Mean starvation resistance reported in  
Mackay et al. 2012  
LifespanHrs\_Everman&Morgan.2018 = Mean starvation resistance reported in  
Everman and Morgan 2018

### **DGRP\_5.txt**

Tab-separated text file of bootstrap results of the sign of SNPs across DGRP data collected in this study, Mackay et al. 2012 and Everman and Morgan 2018. These data are compiled from original bootstrap files. The code presented in File S1 (see file "File\_S1.txt") is formatted to read each file by DataID. (Data are presented in Figure 8.)

Column headers:

%SNPs\_SameSign = Percent of SNPs that have the same sign between  
studies following bootstrap analysis of random samples of SNPs.  
Density = Density calculated from original bootstrap files  
Sex = Female or Male  
DataID = Dataset ID for plotting in File S1  
Comparison = Direction of comparison of SNPs (ThisStudy\_vs\_MackayEtAl2012,  
ThisStudy\_vs\_Everman&Morgan2018, Everman&Morgan2018\_vs\_ThisStudy,  
Everman&Morgan2018\_vs\_MackayEtAl2012, MackayEtAl2012\_vs\_ThisStudy,  
or MackayEtAl2012\_vs\_Everman&Morgan2018)

**DGRP\_6.txt**

Tab-separated text file of adjusted mean starvation resistance DGRP data collected in this study, Mackay et al. 2012 and Everman and Morgan 2018. These data are compiled from original GWA-generated files; code presented in File S1 (see file "File\_S1.txt") is formatted to read each file by Study. Data are used in bootstrap analysis.

Column headers:

RAL.ID = Line ID based on RAL identifier

AdjustedMeanStarvationResistance = Adjusted mean phenotype from GWA of each study

Study = Study in which the original starvation resistance data was collected  
(ThisStudy, MackayEtAl2012, or Everman&Morgan2018)

Sex = (f) female or (m) male

**DGRP\_7.csv**

Comma-separated text file of SNP frequencies for bootstrap analysis, used in File S1 (see file "File\_S1.txt"), generated from dgrp.t.txt in code file. Data are used in bootstrap analysis.

Column headers:

rAF = Reference allele frequency

aAf = Alternate allele frequency

SNP = SNP ID

**DGRP\_8.txt**

Large space-separated matrix of SNP calls for bootstrap analysis, used in File S1 S1 (see file "File\_S1.txt"), called as dgrp.t.txt in code file. Data originally available from dgrp2.gnets.ncsu.edu. Data are used in bootstrap analysis.

Column headers:

id = Line ID based on RAL identifier, formatted "line\_XXX"

\*Remaining Columns: SNP id

Sub-directory = DGRP\_Data/GWAS\_AVG\_Starvation/

Contains DGRP analysis output files (produced by dgrp2.gnets.ncsu.edu) for the average starvation resistance measure calculated for overlapping DGRP lines between this study, Mackay et al. 2012 and Everman and Morgan 2018.

Sub-directory = DGRP\_Data/GWAS\_SJM\_Starvation/

Contains DGRP analysis output files (produced by dgrp2.gnets.ncsu.edu) for the average starvation resistance from this study.
